# Supplementary material for: Social and economic flows across multimodal transportation networks in the Greater Tokyo Area
Source: Springer Nature journal article supplement (doi:10.1007/s41109-019-0244-y), 2020-01-22
Supplement: MOESM1 [file 17589178]

## RESEARCH

# Social and economic flows across multimodal transportation networks in the Greater Tokyo Area: Supplementary Materials

Aaron Bramson<sup>1,2,3,4\*†</sup>, Megumi Hori<sup>1</sup>, Bingran Zha<sup>1</sup> and Hirohisa Inamoto<sup>1</sup>

\*Correspondence:

bramson@ga-tech.co.jp

<sup>1</sup>GA Technologies Inc., Roppongi

Grand Tower 40F, Roppongi

3-2-1, Minato-ku, Tokyo,

106-6290, Japan

Full list of author information is available at the end of the article

†Primary contributor

## Data Details

**Table 1 Summary of the population and employment data used in our analysis. After adjusting each hex's population aged 15-64 by the population adjustment factor and adjust for fractional people we confirm that the total population of the hexes does indeed equal the total number of jobs.**

|                                           |            |
|-------------------------------------------|------------|
| Number of Hexes                           | 244,721    |
| Total Number of Companies                 | 1,417,979  |
| Largest Company Count                     | 831        |
| Total Number of Jobs                      | 16,614,941 |
| Largest Job Count                         | 15,665     |
| Total Population Aged 15-64               | 22,743,338 |
| Population Adjustment Factor              | 0.73054    |
| Total Rounded Adjusted Working Population | 16,613,199 |
| Total Adjusted Working Population         | 16,614,941 |
| Highest Population                        | 2,024      |
| Highest Net Demand                        | 15,665     |
| Highest Net Supply                        | -1,506     |

## Road Network Details

**Table 2 Default speed limits and assumed driving speeds in kph by road type when data was unavailable in [1]. We use the driving speeds and assumptions on lanes to calculate capacity [2, 3, 4]. The number of lanes in refers to the value for one-lane traffic. We use the driving speeds and Haversine distance between endpoint nodes to calculate traversal times.**

| Road Type        | Speed Limit | Driving Speed | Number of Lanes Each Way | Road Link Capacity Vehicles per Hour |
|------------------|-------------|---------------|--------------------------|--------------------------------------|
| Motorway         | 80          | 70            | 3                        | 6000                                 |
| Motorway Link    | 60          | 40            | 1                        | 2000                                 |
| Trunk            | 60          | 30            | 2                        | 4000                                 |
| Trunk Link       | 50          | 30            | 1                        | 2000                                 |
| Primary          | 50          | 30            | 2                        | 2000                                 |
| Primary Link     | 50          | 30            | 1                        | 1000                                 |
| Secondary        | 40          | 30            | 1                        | 1000                                 |
| Secondary Link   | 40          | 30            | 1                        | 1000                                 |
| Tertiary         | 30          | 30            | 1                        | 1000                                 |
| Tertiary Link    | 30          | 30            | 1                        | 1000                                 |
| Road (undefined) | 30          | 25            | 1                        | 500                                  |

## Network Structure Summary

**Table 3 Summary of basic network features by transportation mode. Train and bus networks are bi-directional, but the timeWeights of access edges are asymmetric. The road network includes 23.1% one-way links, often representing each side of a divided two-road. The hex network as well as the intermode walking links are fully symmetrically bi-directional. Train station and bus stop edge counts include both transfer and access links.**

| Transportation Mode    | Node Count | Directed Edge Count |
|------------------------|------------|---------------------|
| Train Stations         | 1,546      | 46,028              |
| Train Lines            | 5,179      | 10,536              |
| Bus Stops              | 32,901     | 710,432             |
| Bus Routes             | 93,086     | 181,574             |
| Road Network           | 58,012     | 113,582             |
| Hex Network            | 244,721    | 1,459,096           |
| Intermode "Glue" Links | 0          | 434,892             |
| Integrated Network     | 435,445    | 2,921,886           |

### Analysis Details

**Table 4** The greatest net demand equals the highest value for jobs, indicating the population is zero there. The greatest supply (negative demand) is 518 less than the greatest population, indicating that there are at least 519 jobs (actually it's 808 jobs) in that hex. The hex with a supply of 1,506 has an adjusted working population of 1,638.

|                    |        |
|--------------------|--------|
| Highest Net Demand | 15,665 |
| Highest Net Supply | 1,506  |

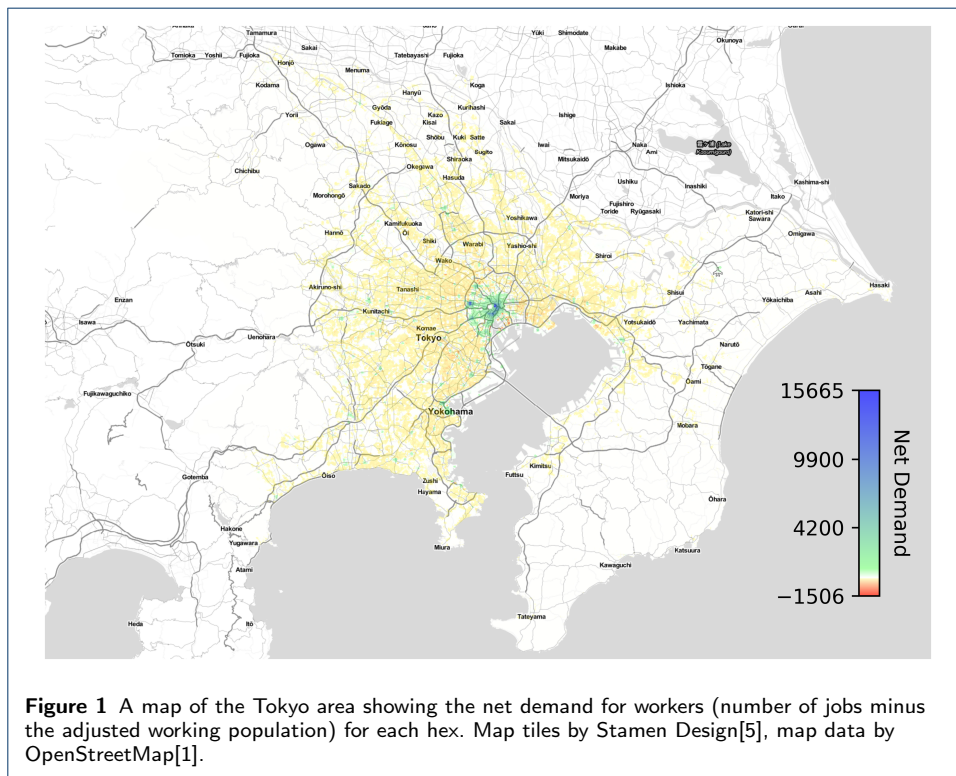

### Results Details

**Table 5** Total usage frequency of each link mode used for three generated flow datasets. The number of times an edge is used is less informative than the distance traveled and time spent on each edge modality, but is still informative for certain usage statistics such as transfers and access links.

| Modularity    | Simplex Algorithm<br>1,000,000 Demand | Random Trips<br>300,000 To Work | Random Trips<br>300,000 From Work |
|---------------|---------------------------------------|---------------------------------|-----------------------------------|
| hex           | 683,871                               | 466,386                         | 466,431                           |
| walk          | 1,852,251                             | 2,123,304                       | 2,121,659                         |
| train         | 1,157,548                             | 1,887,936                       | 1,889,764                         |
| trainTransfer | 52,778                                | 221,755                         | 221,233                           |
| trainAccess   | 407,128                               | 553,800                         | 553,802                           |
| bus           | 66,912                                | 65,757                          | 65,735                            |
| busAccess     | 35,280                                | 30,900                          | 30,898                            |
| busTransfer   | 480                                   | 1,744                           | 1,744                             |
| road          | 2,431,690                             | 3,972,597                       | 3,972,191                         |

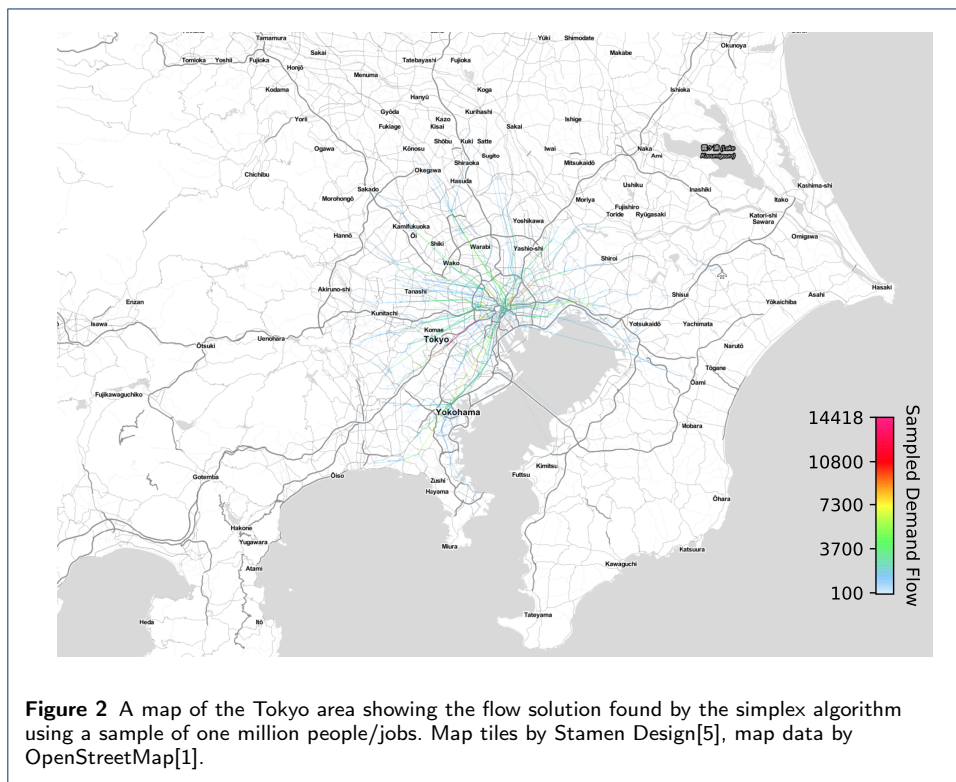

**Table 6** Percent of the usage frequency of links by modality for three generated flow datasets.

| Modularity    | Simplex Algorithm<br>1,000,000 Demand | Random Trips<br>300,000 To Work | Random Trips<br>300,000 From Work |
|---------------|---------------------------------------|---------------------------------|-----------------------------------|
| hex           | 10.225                                | 5.002                           | 5.003                             |
| walk          | 27.695                                | 22.772                          | 22.756                            |
| train         | 17.308                                | 20.248                          | 20.269                            |
| trainTransfer | 0.789                                 | 2.378                           | 2.373                             |
| trainAccess   | 6.087                                 | 5.939                           | 5.94                              |
| bus           | 1.0                                   | 0.705                           | 0.705                             |
| busAccess     | 0.528                                 | 0.331                           | 0.331                             |
| busTransfer   | 0.007                                 | 0.019                           | 0.019                             |
| road          | 36.359                                | 42.605                          | 42.604                            |

**Table 7** The total amount of time used by each link modality for three generated flow datasets.

| Modularity    | Simplex Algorithm<br>1,000,000 Demand | Random Trips<br>300,000 To Work | Random Trips<br>300,000 From Work |
|---------------|---------------------------------------|---------------------------------|-----------------------------------|
| hex           | 2,051,579.26                          | 1,399,160.0                     | 1,399,294.57                      |
| walk          | 1,700,939.41                          | 1,970,929.0                     | 1,970,769.13                      |
| train         | 5,258,420.73                          | 9,181,407.0                     | 9,184,124.36                      |
| trainTransfer | 263,890.0                             | 1,108,775.0                     | 1,106,165.0                       |
| trainAccess   | 1,221,384.0                           | 1,661,400.0                     | 1,661,406.0                       |
| bus           | 242,072.0                             | 297,467.0                       | 297,479.0                         |
| busAccess     | 105,840.0                             | 92,700.0                        | 92,694.0                          |
| busTransfer   | 2,400.0                               | 8,720.0                         | 8,720.0                           |
| road          | 206,6997.7                            | 349,6978.0                      | 349,6883.4                        |

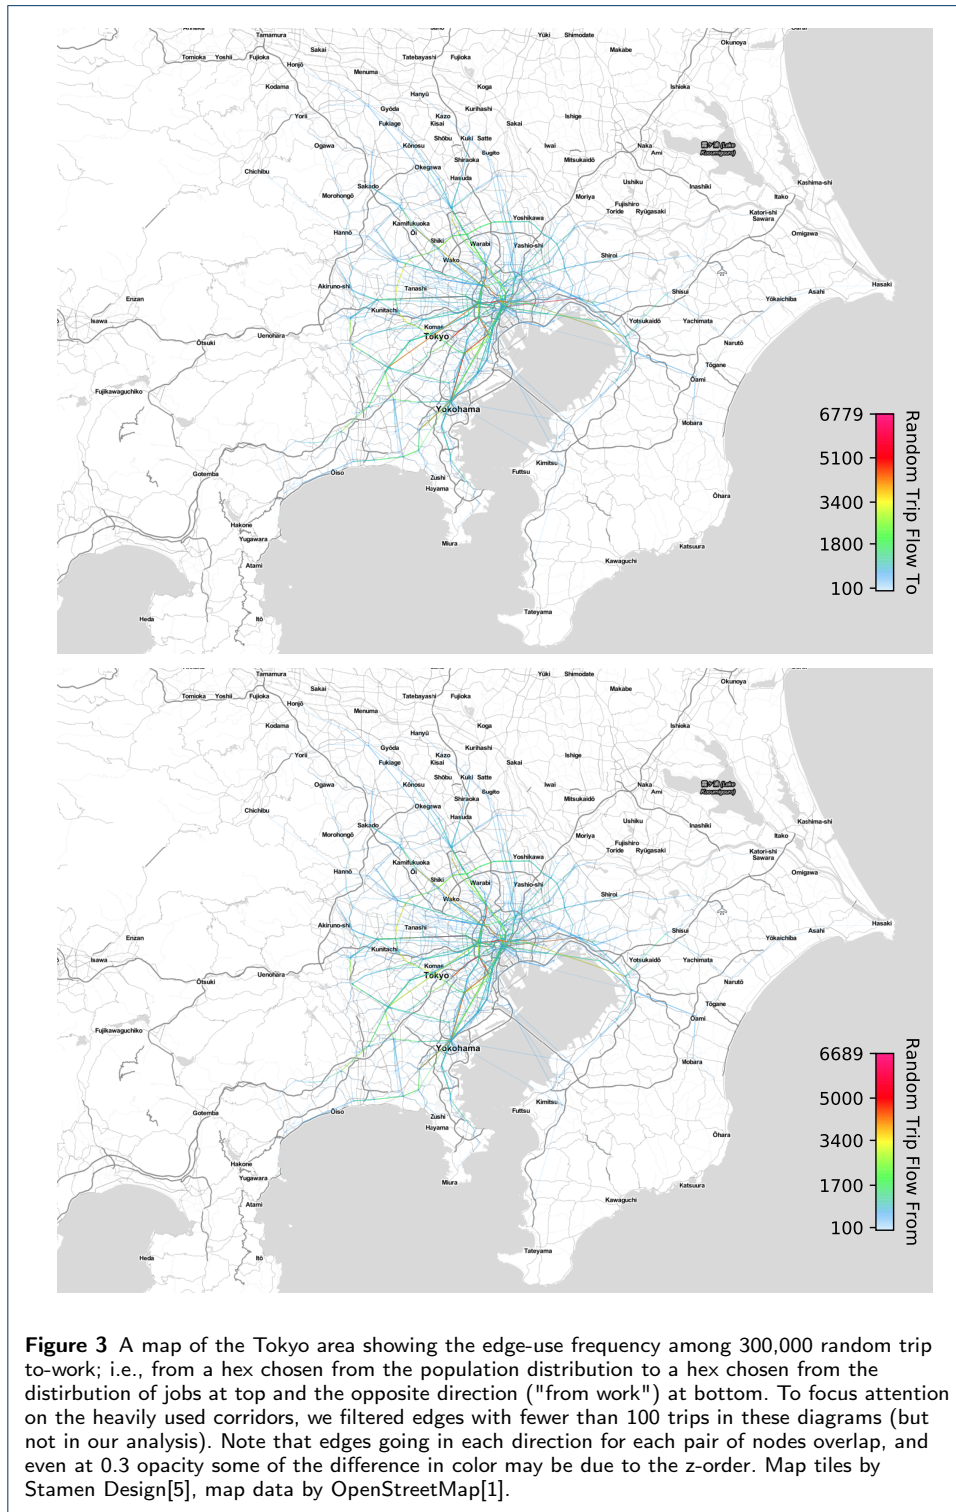

**Figure 3** A map of the Tokyo area showing the edge-use frequency among 300,000 random trip to-work; i.e., from a hex chosen from the population distribution to a hex chosen from the distribution of jobs at top and the opposite direction ("from work") at bottom. To focus attention on the heavily used corridors, we filtered edges with fewer than 100 trips in these diagrams (but not in our analysis). Note that edges going in each direction for each pair of nodes overlap, and even at 0.3 opacity some of the difference in color may be due to the z-order. Map tiles by Stamen Design[5], map data by OpenStreetMap[1].

**Table 8** The percent of total travel time used by each link modality for three generated flow datasets.

| Modularity    | Simplex Algorithm<br>1,000,000 Demand | Random Trips<br>300,000 To Work | Random Trips<br>300,000 From Work |
|---------------|---------------------------------------|---------------------------------|-----------------------------------|
| hex           | 15.887                                | 7.281                           | 7.281                             |
| walk          | 13.172                                | 10.256                          | 10.255                            |
| train         | 40.72                                 | 47.776                          | 47.79                             |
| trainTransfer | 2.044                                 | 5.77                            | 5.756                             |
| trainAccess   | 9.458                                 | 8.645                           | 8.645                             |
| bus           | 1.875                                 | 1.548                           | 1.548                             |
| busAccess     | 0.82                                  | 0.482                           | 0.482                             |
| busTransfer   | 0.019                                 | 0.045                           | 0.045                             |
| road          | 16.006                                | 18.197                          | 18.196                            |

**Table 9** The total distance traveled via each link modality for three generated flow datasets.

| Modularity    | Simplex Algorithm<br>1,000,000 Demand | Random Trips<br>300,000 To Work | Random Trips<br>300,000 From Work |
|---------------|---------------------------------------|---------------------------------|-----------------------------------|
| hex           | 170,964,938                           | 116,596,626                     | 11,660,7881                       |
| walk          | 141,762,124                           | 164,283,266                     | 164,269,961                       |
| train         | 4,594,523,349                         | 8,191,513,698                   | 8,191,803,582                     |
| trainTransfer | 4,380,574                             | 18,405,665                      | 18,362,339                        |
| trainAccess   | 33,791,624                            | 45,965,400                      | 45,965,566                        |
| bus           | 171,822,488                           | 203,399,144                     | 203,401,724                       |
| busAccess     | 2,928,240                             | 2,564,700                       | 2,564,534                         |
| busTransfer   | 39,840                                | 144,752                         | 144,752                           |
| road          | 1,037,008,963                         | 1,753,357,535                   | 1,753,316,536                     |

**Table 10** The percent of total travel distance used by each link modality for three generated flow datasets.

| Modularity    | Simplex Algorithm<br>1,000,000 Demand | Random Trips<br>300,000 To Work | Random Trips<br>300,000 From Work |
|---------------|---------------------------------------|---------------------------------|-----------------------------------|
| hex           | 2.777                                 | 1.111                           | 1.111                             |
| walk          | 2.302                                 | 1.565                           | 1.565                             |
| train         | 74.62                                 | 78.042                          | 78.044                            |
| trainTransfer | 0.071                                 | 0.175                           | 0.175                             |
| trainAccess   | 0.549                                 | 0.438                           | 0.438                             |
| bus           | 2.791                                 | 1.938                           | 1.938                             |
| busAccess     | 0.048                                 | 0.024                           | 0.024                             |
| busTransfer   | 0.001                                 | 0.001                           | 0.001                             |
| road          | 16.842                                | 16.705                          | 16.704                            |

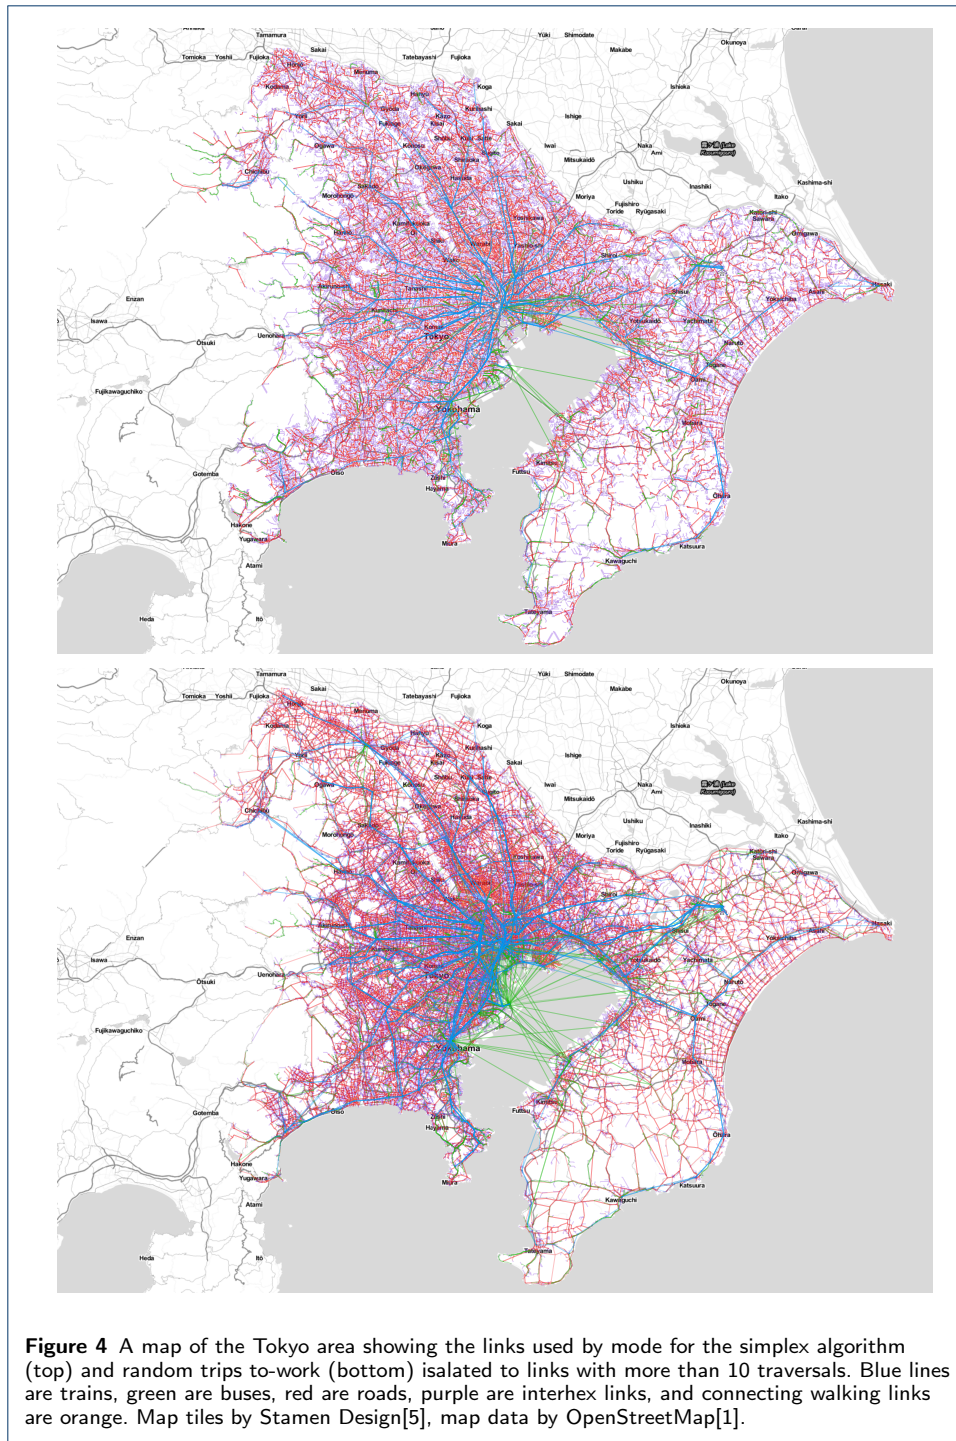

#### Availability of Data and Material

As described in the text, the population/employment/mesh data and road network data are openly available from the citations provided. The train and bus network data come from third-party sources (Ekitan). Additional output data and/or plots of data generated are available upon request.

#### Author details

<sup>1</sup>GA Technologies Inc., Roppongi Grand Tower 40F, Roppongi 3-2-1, Minato-ku, Tokyo, 106-6290, Japan.

<sup>2</sup>Center for Biosystems Dynamics Research, Riken, 2-1 Hirosawa, Wakoshi, Saitama, 351-0198, Japan.

<sup>3</sup>Department of General Economics, Ghent University, Tweeckerkenstraat 2, Ghent, 9000, Belgium.

<sup>4</sup>Department of Software and Information Systems, University of North Carolina Charlotte, 9201 University City Blvd., Charlotte, NC, 28223, USA.

#### References

1. OpenStreetMap Contributors: Planet dump retrieved from <https://planet.osm.org> (2019).  
<https://www.openstreetmap.org>
2. Japan Traffic Safety Association: Rules of the Road. Japan Automobile Federation (2017)
3. Polus, A., Craus, J., Livneh, M.: Flow and capacity characteristics on two-lane rural highways. *Transportation Research Record (1320)* (1991)
4. Highway Capacity Manual: Highway capacity manual. Washington, DC 2 (2000)
5. Stamen Design: Map Tiles (2019). <http://maps.stamen.com>
